# Supplementary material
Source: MDPI journal article supplement (https://www.mdpi.com/2073-4395/13/2/392)
Supplement: s1 [file s1]

## Supplementary information

**Table S1.** Contents of soil nutrient in bulk soil under different treatments.

| Treatment | pH            | SOC<br>(mg/kg) | TN<br>(mg/kg) | Available P<br>(mg/kg) | Available K<br>(mg/kg) |
|-----------|---------------|----------------|---------------|------------------------|------------------------|
| CK        | 8.73 ± 0.05 a | 3.80 ± 0.12 c  | 0.43 ± 0.02 b | 6.28 ± 0.63 b          | 90.95 ± 7.29 b         |
| NPK       | 8.42 ± 0.05 c | 3.88 ± 0.21 c  | 0.48 ± 0.03 b | 12.10 ± 0.25 a         | 127.83 ± 13.59 a       |
| BC        | 8.71 ± 0.04 a | 6.33 ± 0.22 b  | 0.57 ± 0.01 a | 7.36 ± 0.21 b          | 122.46 ± 9.85 a        |
| BC+NPK    | 8.57 ± 0.03 b | 6.71 ± 0.08 a  | 0.63 ± 0.06 a | 12.98 ± 1.93 a         | 141.96 ± 0.40 a        |

Note: Data are means ± standard deviation, n=3. Different lowercase letters indicate the significant differences in soil nutrient contents ( $P < 0.05$ ) among treatments. No fertilization treatment (CK), application of chemical fertilizers treatment (NPK), application of biochar treatment (BC), combined application of biochar and chemical fertilizers treatment (BC + NPK). Abbreviations: SOC, soil organic carbon; TN, total nitrogen; Available P, available phosphorus; Available K, available potassium.
